# Supplementary material
Source: publisher figshare collection journal article supplement (https://acs.figshare.com/ndownloader/files/4153957)
Supplement: Supplementary file 1 [file 4153957]

## Supporting Information

### Incorporation of Manganese Dioxide within Ultraporous Activated Graphene for High-Performance Electrochemical Capacitors

Xin Zhao<sup>†,‡</sup>, Lili Zhang<sup>†</sup>, Shanthi Murali<sup>†</sup>, Meryl D Stoller, <sup>†</sup>, Qinghua Zhang<sup>‡</sup>, Yanwu Zhu,<sup>\*,§</sup> and Rodney S. Ruoff<sup>\*,†</sup>

<sup>†</sup>Department of Mechanical Engineering and the Materials Science and Engineering Program, The University of Texas at Austin, One University Station C2200, Austin, TX 78712,

<sup>‡</sup>State Key Laboratory for Modification of Chemical Fibers and Polymer Materials, College of Materials Science and Engineering, Donghua University, Shanghai, 201620, P. R. China,

<sup>§</sup>Department of Materials Science and Engineering, University of Science and Technology of China, Hefei, 230036, P. R. China.

Email: [r.ruoff@mail.utexas.edu](mailto:r.ruoff@mail.utexas.edu), [zhuyanwu@ustc.edu.cn](mailto:zhuyanwu@ustc.edu.cn)

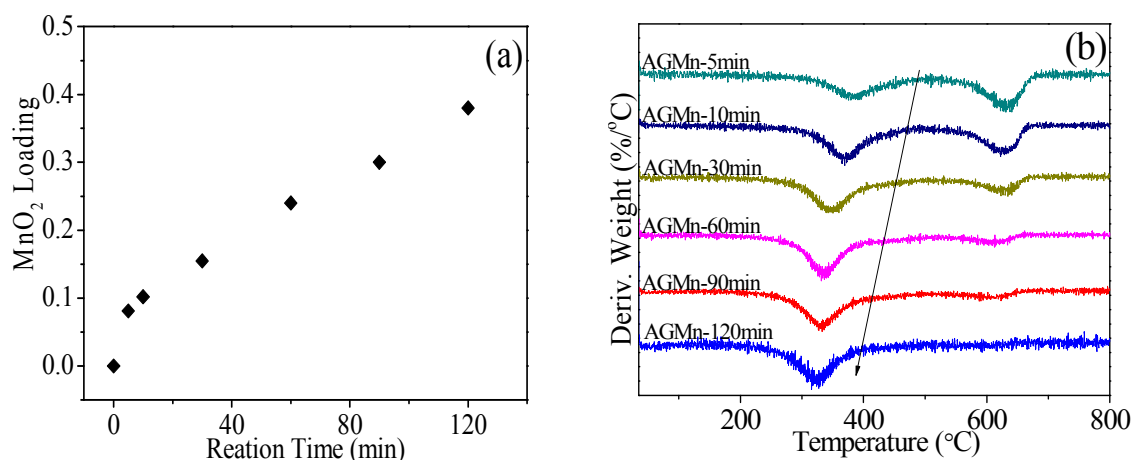

Figure S1. (a) MnO<sub>2</sub> mass uptake plotted as a function of reaction time, (b) DTG curves AGMn composites with different reaction times.

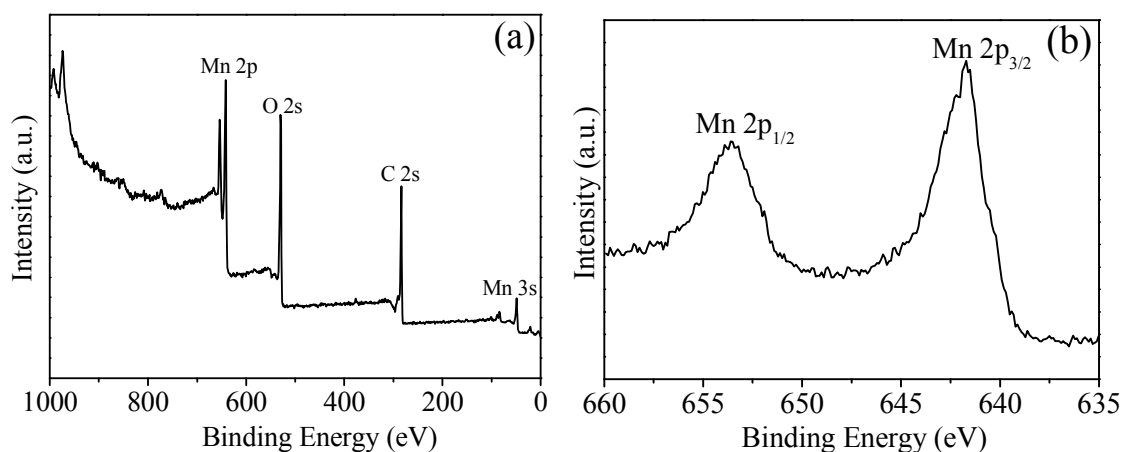

Figure S2. (a) XPS survey spectrum of AGMn-10min, indicating the presence of Mn and O as well as C elements in composites, (b) Mn spectrum for AGMn-10min.

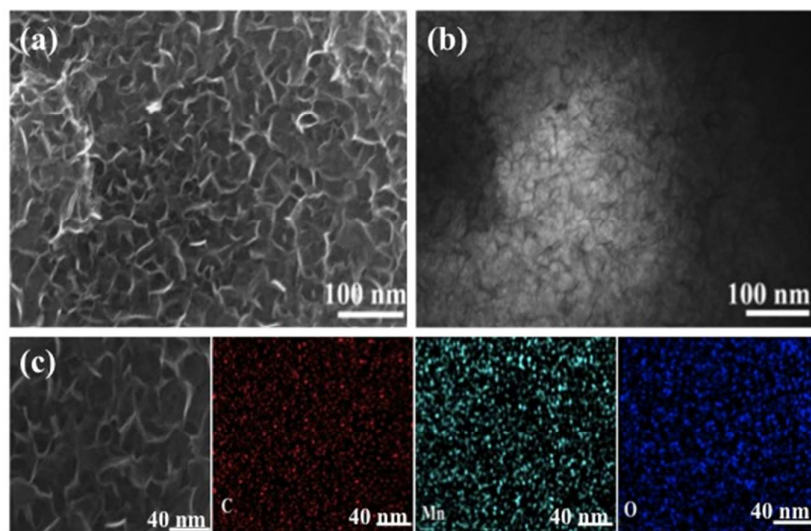

Figure S3. (a) High resolution SEM image of AGMn-120min nanocomposites, (b) BF-STEM image of the same area as (a), (c) SEM image combined with EDS mapping in the same area and relative intensities of C (red), Mn (green) and O (blue) elements.

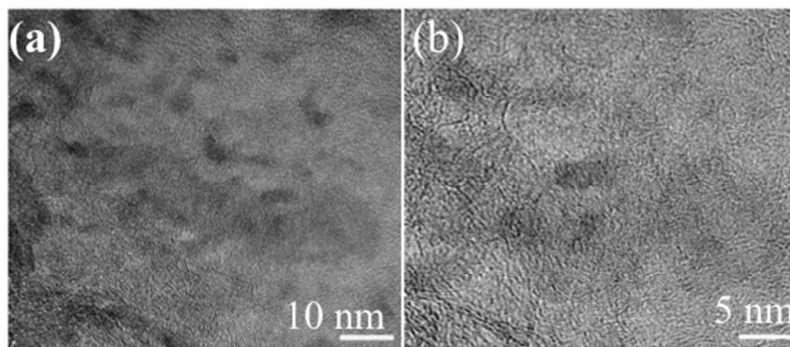

Figure S4. Transmission electron micrographs for AGMn-10min-h with different magnifications

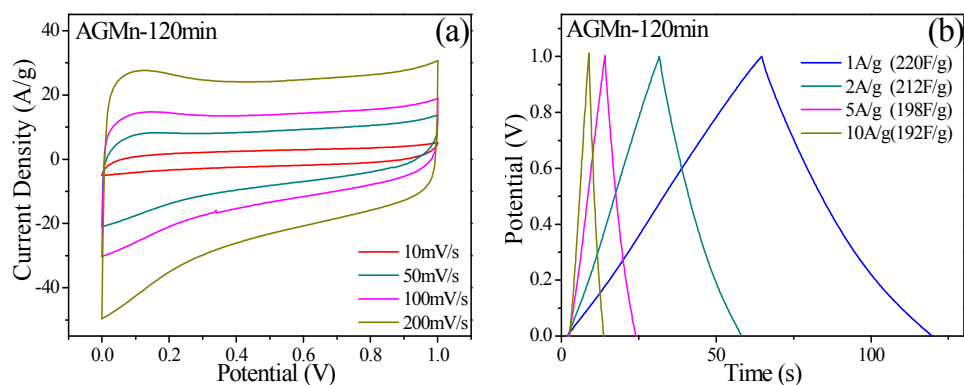

Figure S5. (a) Cyclic voltammograms and (b) charge-discharge curves with different rates for AGMn-120min composites.

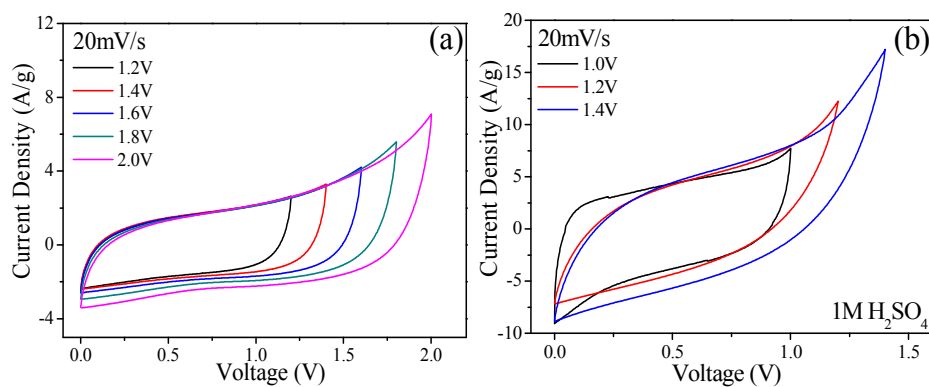

Figure S6. (a) CV curves of an optimized AGMn// aMEGO asymmetric supercapacitor measured at different potential windows in 1M Na<sub>2</sub>SO<sub>4</sub> aqueous solution (b) and 1M H<sub>2</sub>SO<sub>4</sub> aqueous solution at a scan rate of 20 mV/s.
